# Supplementary material
Source: PubMed Central journal article supplement (PMC9985648)
Supplement: 42003_2023_4605_MOESM2_ESM.pdf [file 42003_2023_4605_MOESM2_ESM.pdf]

## **Supplementary Information**

### **Protein structure and folding pathway prediction based on remote homologs recognition using PThreader**

Kailong Zhao<sup>1</sup>, Yuhao Xia<sup>1</sup>, Fujin Zhang<sup>1</sup>, Xiaogen Zhou<sup>1</sup>, Stan Z. Li<sup>2\*</sup>, and Guijun Zhang<sup>1\*</sup>

<sup>1</sup> College of Information Engineering, Zhejiang University of Technology, HangZhou 310023, China; <sup>2</sup> AI Lab, Research Center for Industries of the Future, Westlake University, Hangzhou 310024, Zhejiang, China.

\*Correspondence should be addressed to Guijun Zhang (zgj@zjut.edu.cn) and Stan Z. Li (Stan.ZQ.Li@westlake.edu.cn).

## Supplementary Note

### **Note S1. Structure clustering in master structure database construction.**

We used a greedy incremental clustering method similar to CD-HIT<sup>1</sup> to construct the master structure database. The clustering algorithm sorts the structures according to the sequence length from long to short, and processes them in the order from longest to shortest. The first structure is used as the first cluster representative structure. Each structure of the remaining structures is then compared to a previously found representative structures, and is classified as redundant or representative based on whether it is similar to one of the existing representative structures. After the structure is grouped into representative, it does not need to be compared with other representatives. The similarity of the two structures is measured by the TM-score calculated by TM-align. When the reference structures are different, two scores are calculated for the similarity of the two structures. Both scores are above 0.8 to be classified as one group. Therefore, the lengths of structures in the same cluster are all in the range  $[0.8*L, 1.25*L]$ , where  $L$  is the length of the representative structure.

## Supplementary Figures

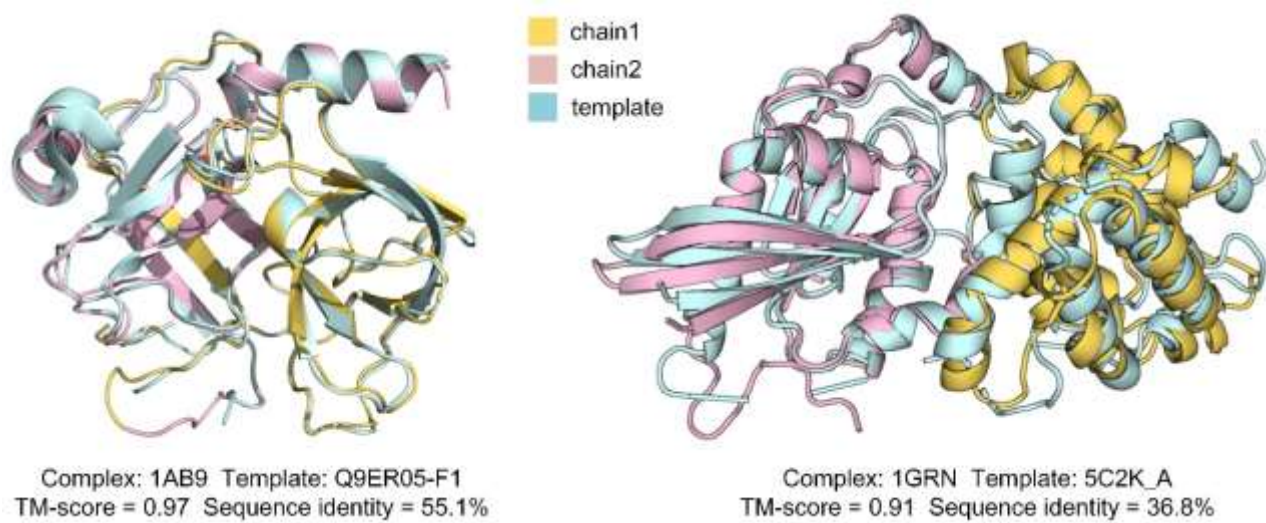

**Figure S1.** Monomeric templates (blue) detected by Pathreader for complexes 1AB9 and 1GRN.

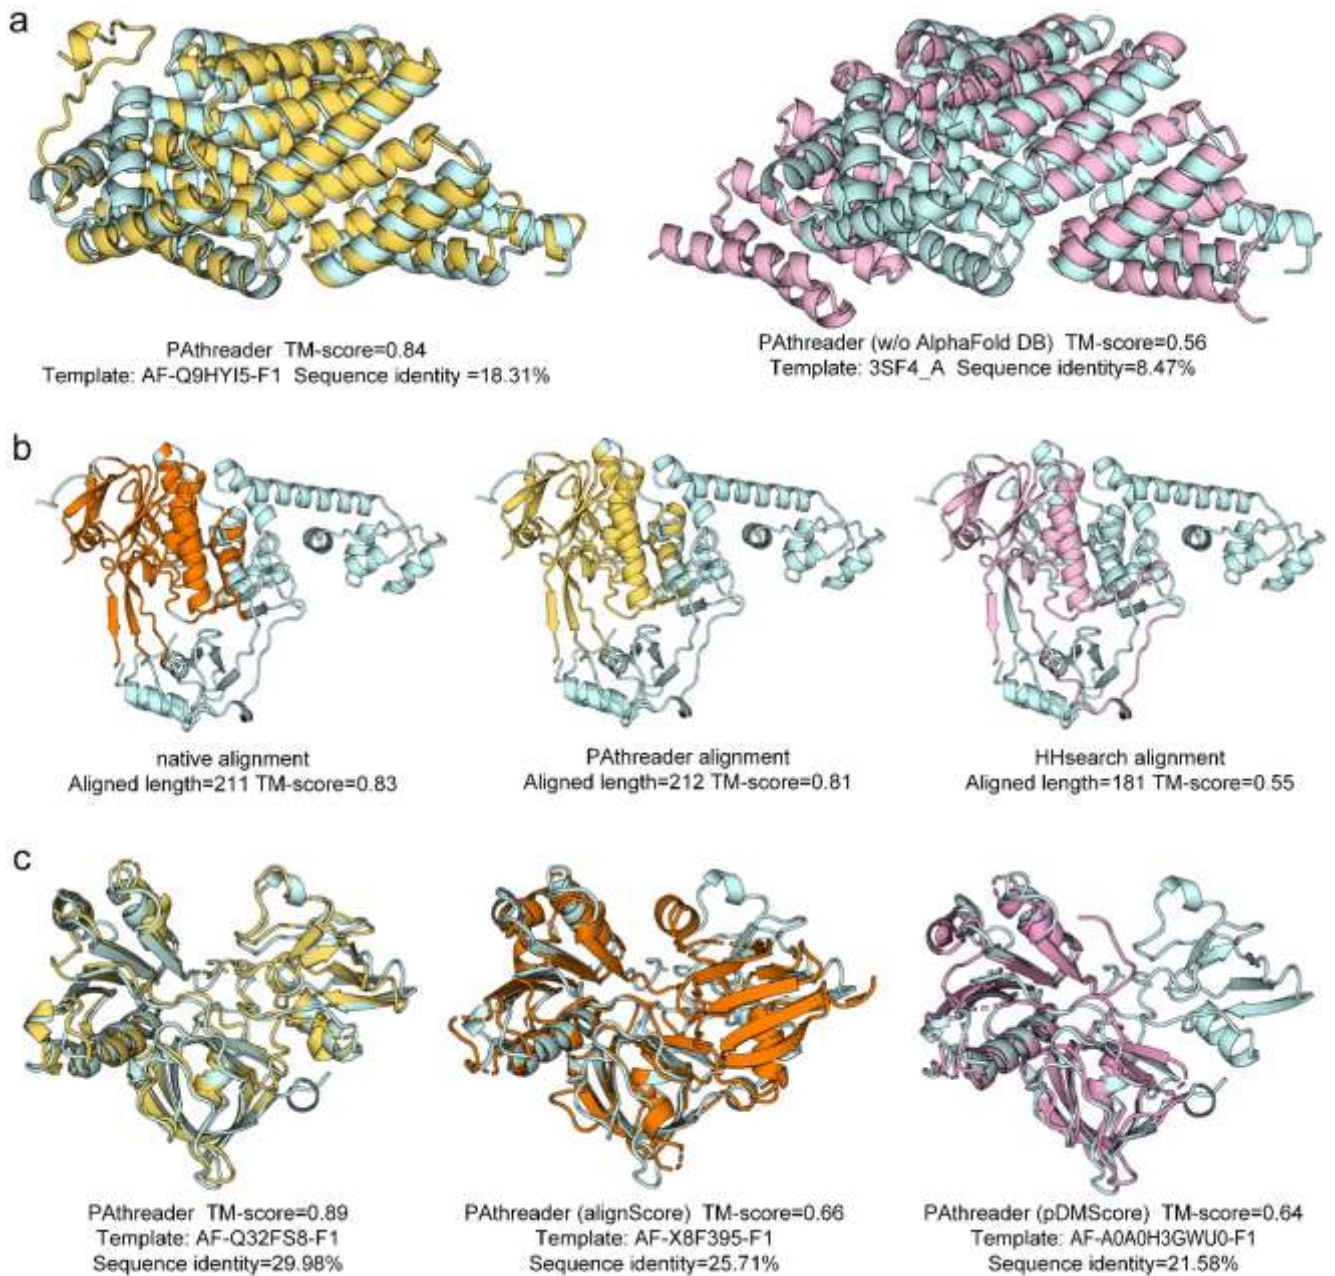

**Figure S2. a** An illustrative example from 1HZ4\_A, showing the structure superposition of the PATHreader template (yellow) and PATHreader (w/o AlphaFold DB) template (pink) with the native structure (blue). **b** An illustrative example from 2CUL\_A shows that PATHreader and HHsearch provide different alignment results for the same structure. 3CES\_A (blue) is identified as the best template structure for the query target using both PATHreader and HHsearch. The native alignment (orange) represents the result obtained by comparing the identified structure with the native structure through TM-align. The PATHreader alignment (yellow) is obtained by threading the sequences into the identified structures based on the sequence alignment provided by the three-track alignment, and the HHsearch alignment (pink) is generated by Hidden Markov-constructed profiles comparison. **c** An illustrative example from 2PIA\_A, showing the structure superposition of the PATHreader template (yellow), PATHreader (alignScore) template (orange) and PATHreader (pDMscore) template (pink) with native structure (blue).

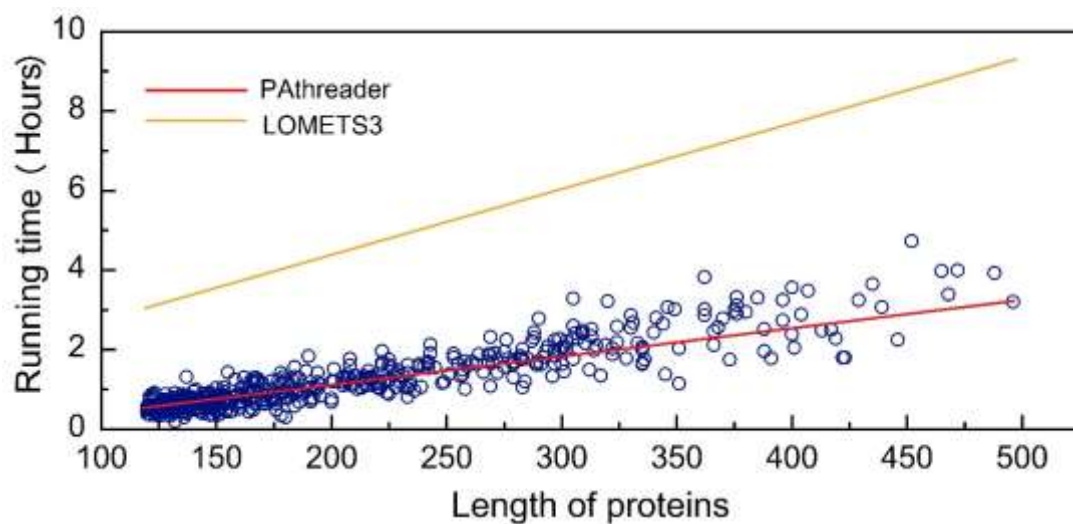

**Figure S3.** The running time of Pathreader and LOMETS3 to search templates. The x-axis is the length of protein and the y-axis is the running time in hours. The running time of LOMETS3 are taken from the supporting information of LOMETS3<sup>3</sup>, and that of Pathreader is linearly fitted according to the actual running time on 551 test proteins.

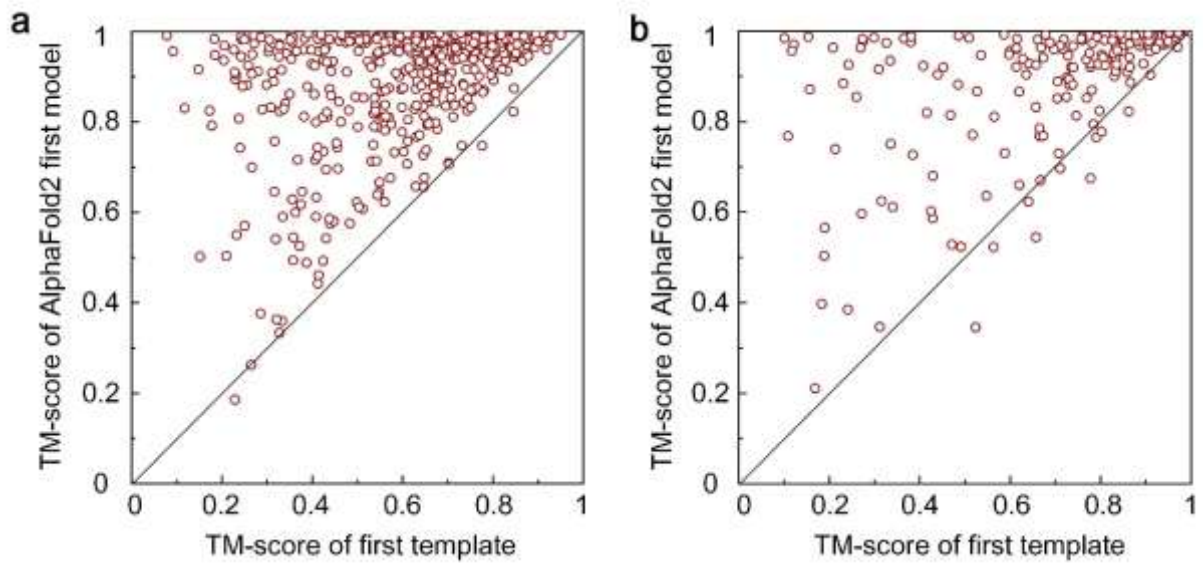

**Figure S4. a, b** The relationship between model accuracy and template quality of AlphaFold2 on 551 test proteins and 186 cameo proteins, respectively. In the modeling of AlphaFold2, templates with  $\geq 30\%$  sequence identity were removed. We selected the first template of HHsearch to compare with AlphaFold2's first model. The first template is obtained by ranking Sum\_probs values of HHsearch templates. Sum\_probs is the sum over the posterior probabilities of all aligned pairs of match states, which usually correspond to the template with the highest accuracy<sup>2</sup>.

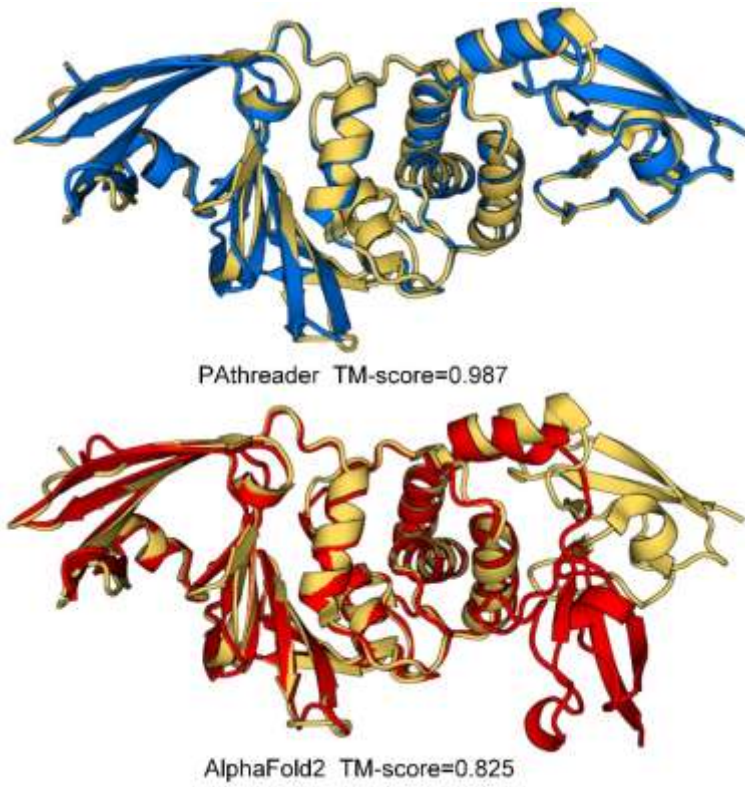

**Figure S5.** An illustrative example from Papain-like proteinase of SARS-CoV-2 virus, showing the structure superposition of the PAtreader model (blue) and AlphaFold2 model (red) with the native structure (yellow).

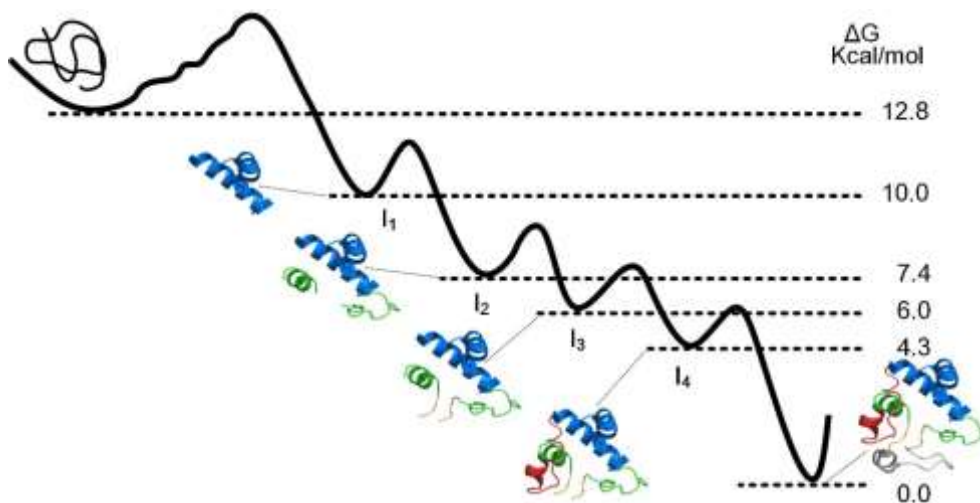

**Figure S6.** The second experimental pathway of horse heart cytochrome c is determined by hydrogen exchange (HX) pulse labeling and nuclear magnetic resonance (NMR). The literature show that cytochrome c unfolds by stepping uphill through a ladder form. First, the grey bottom loop of cytochrome c unfolded alone, then grey + red unfolded, then these two + yellow unfolded, then these three + green, and finally N- and C-terminal blue helical segments unfolded<sup>4,5</sup>. It contains 4 folding intermediates,  $I_1$ ,  $I_2$ ,  $I_3$  and  $I_4$ .



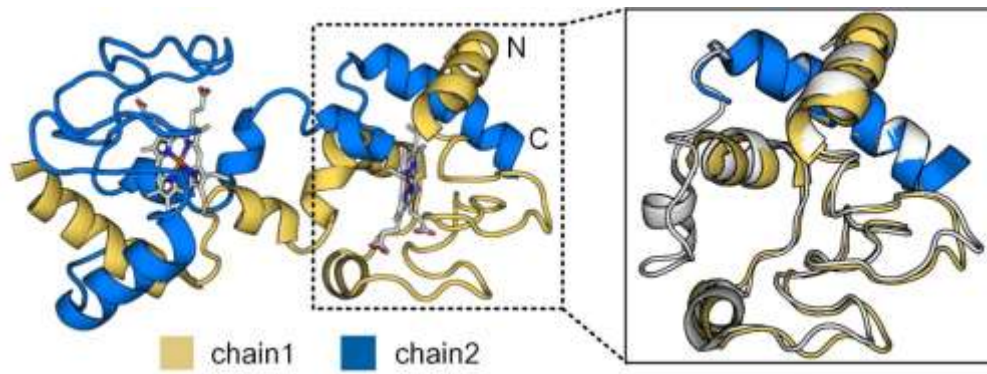

**Figure S7.** Crystal structure of a domain-swapped dimer of yeast iso-1-cytochrome c with omega-undecylenyl-beta-D-maltopyranoside (PDB ID: 5KLU). The solid line box is the partial superposition of 5KLU and structure of horse heart cytochrome c (grey).

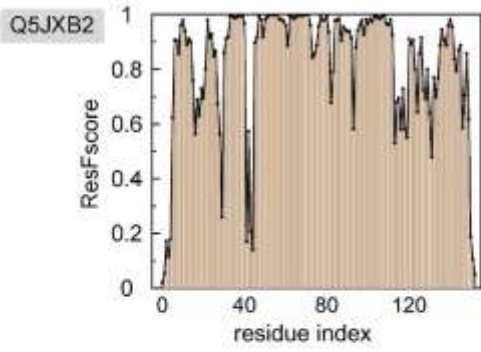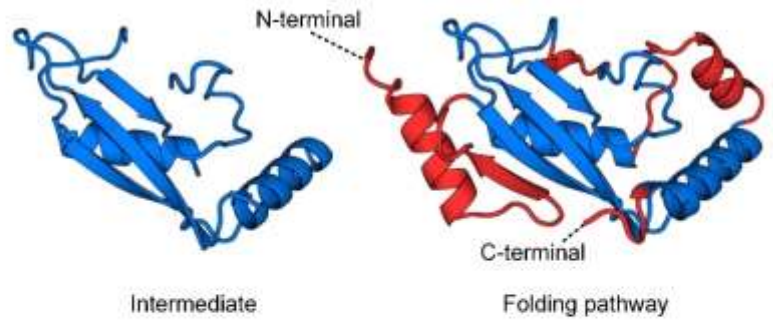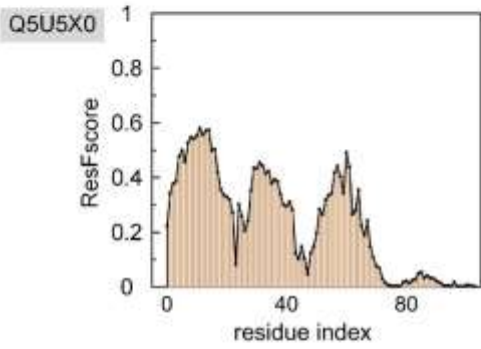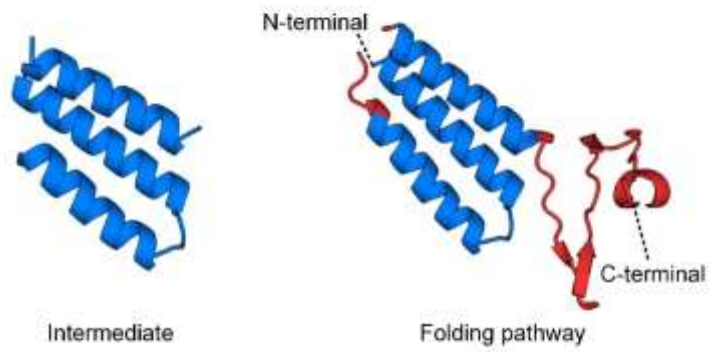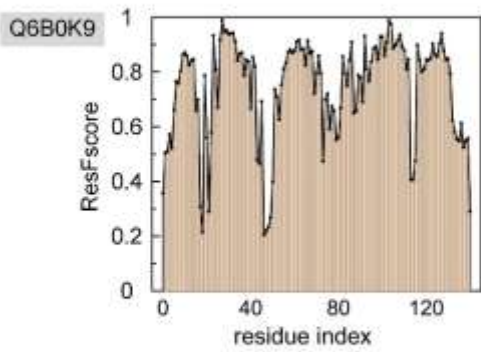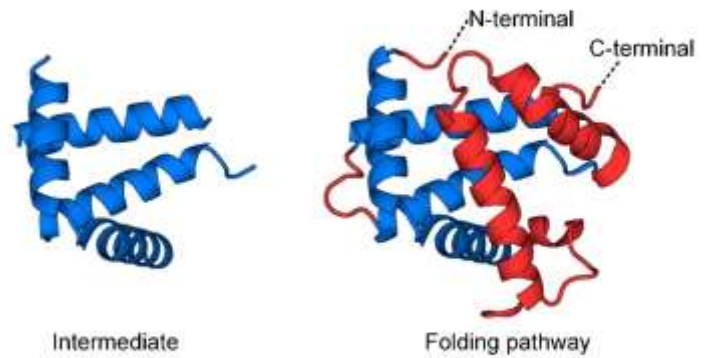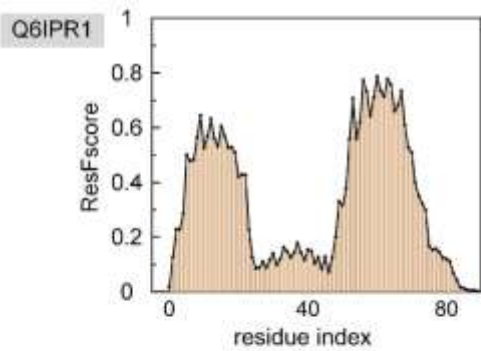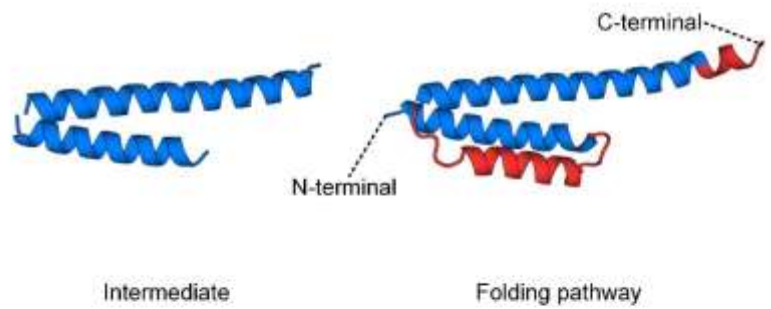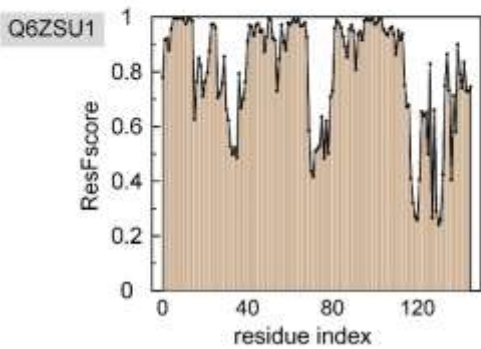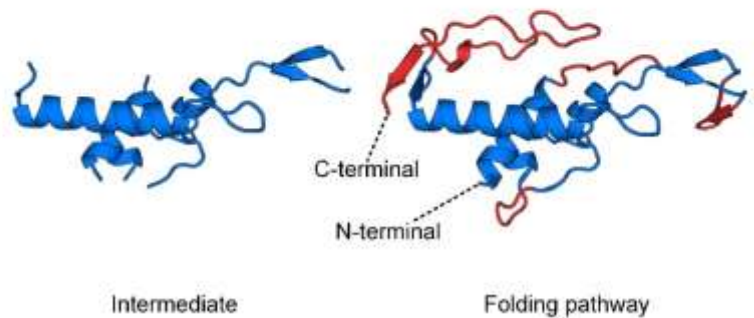

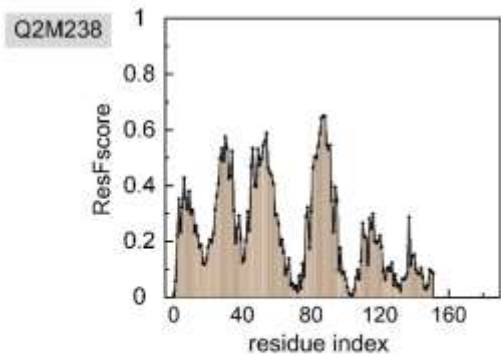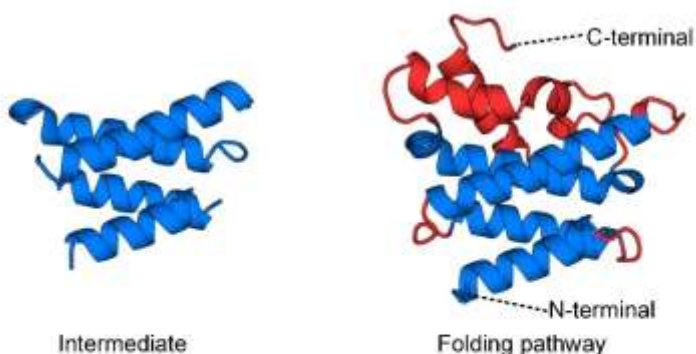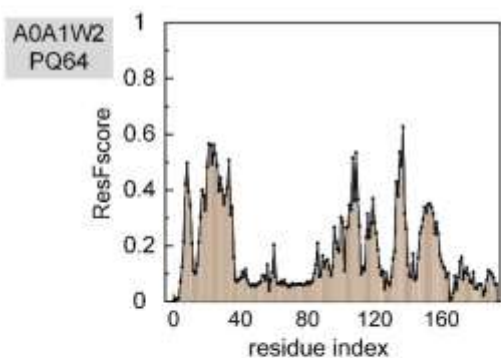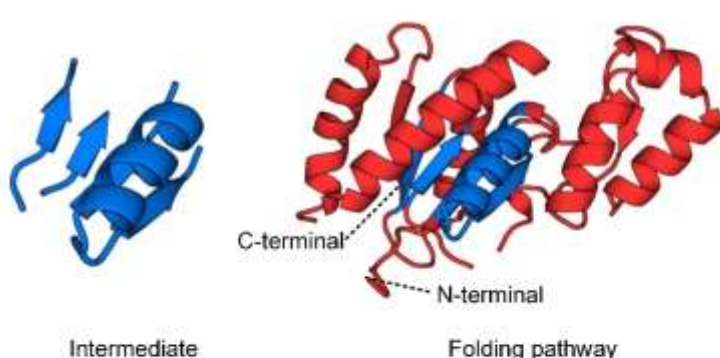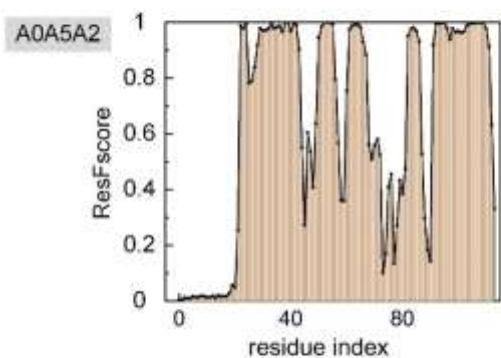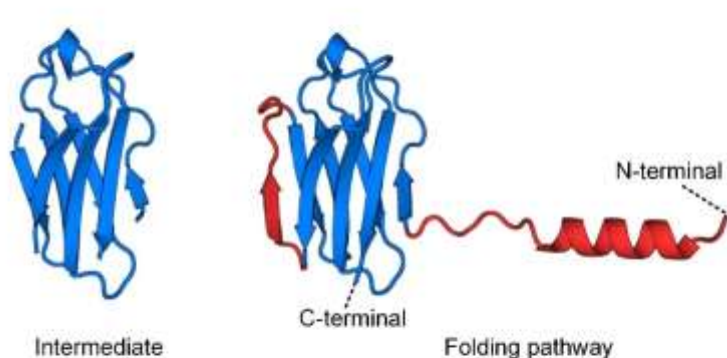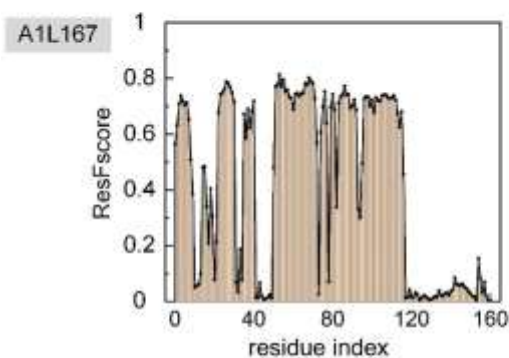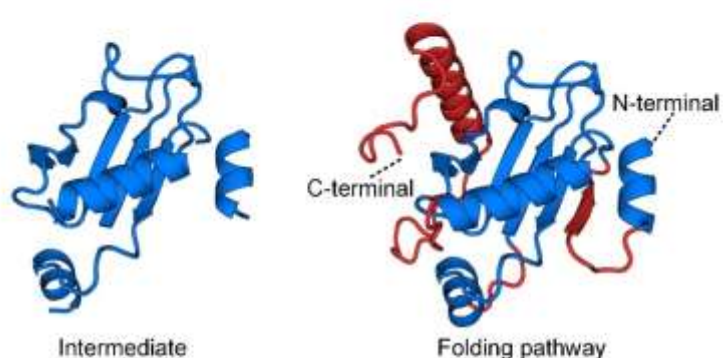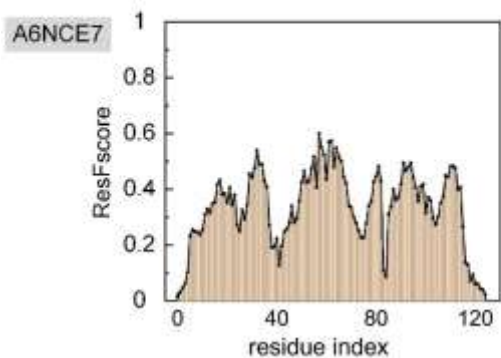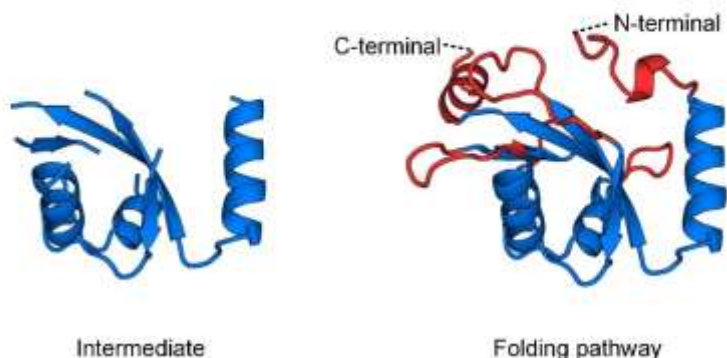

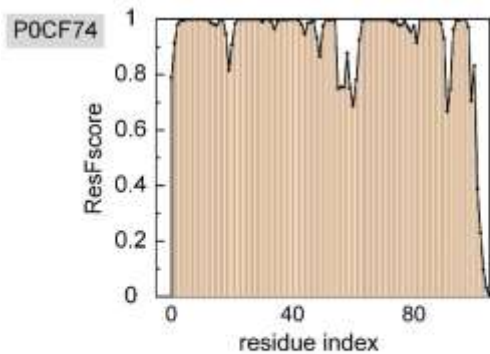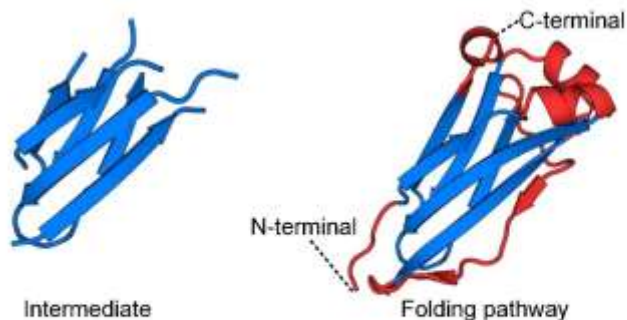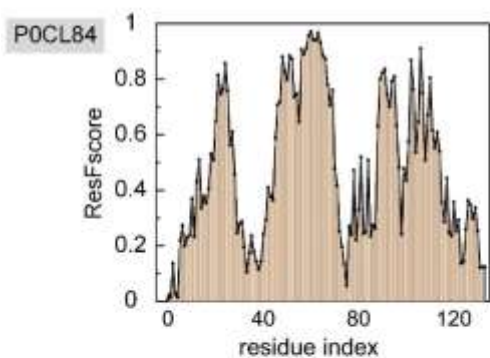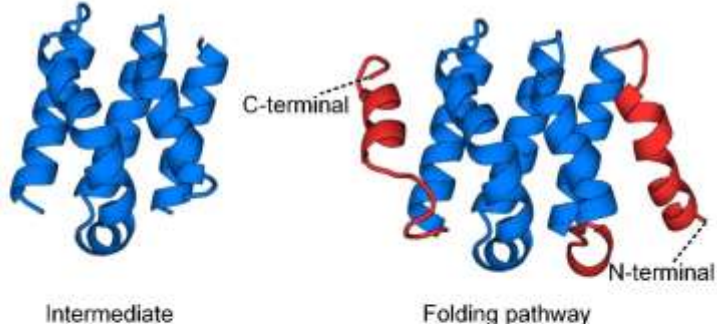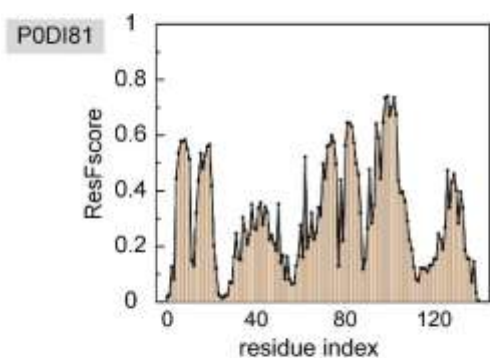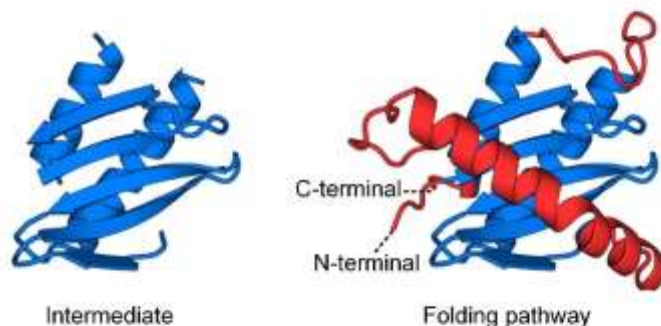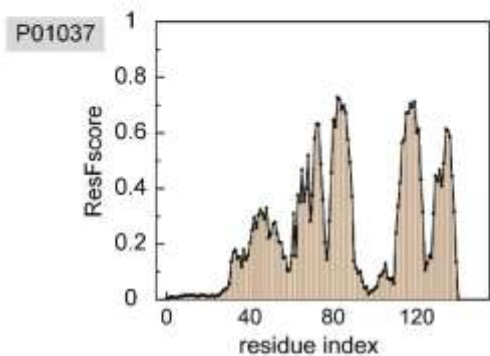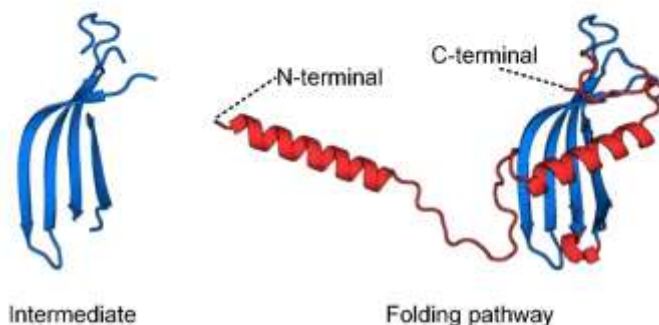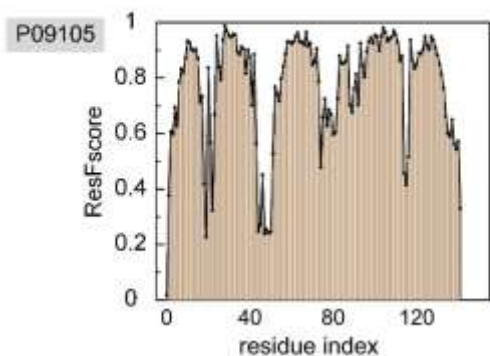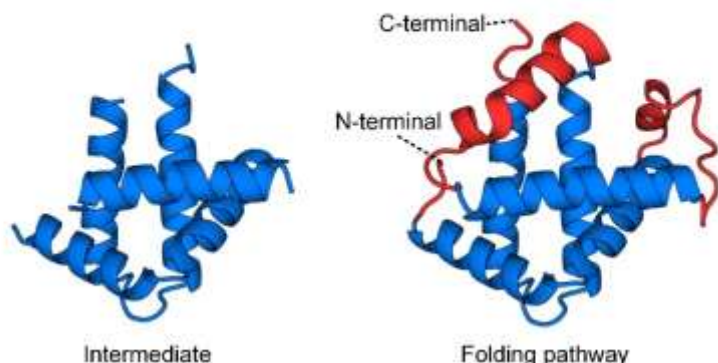

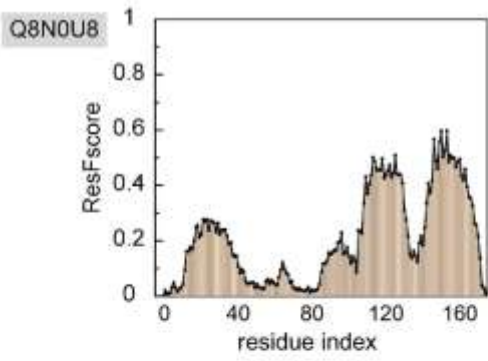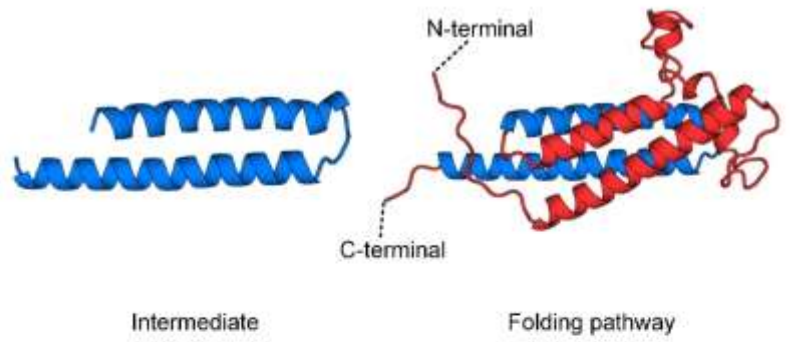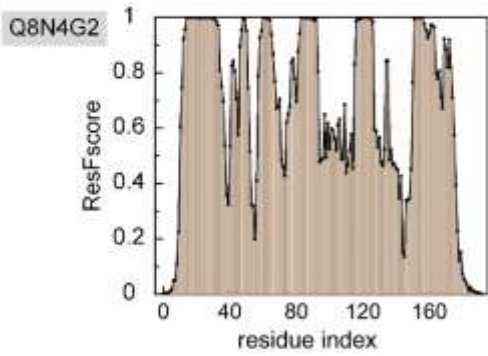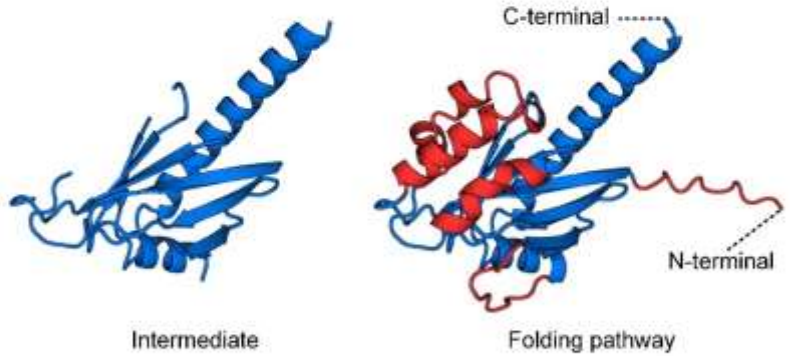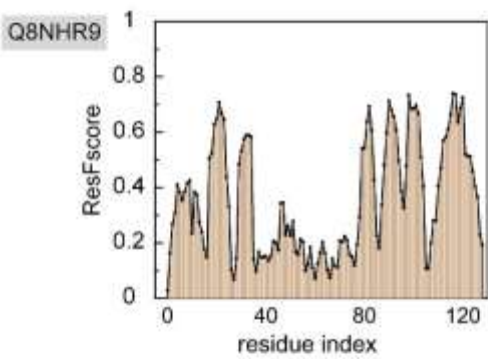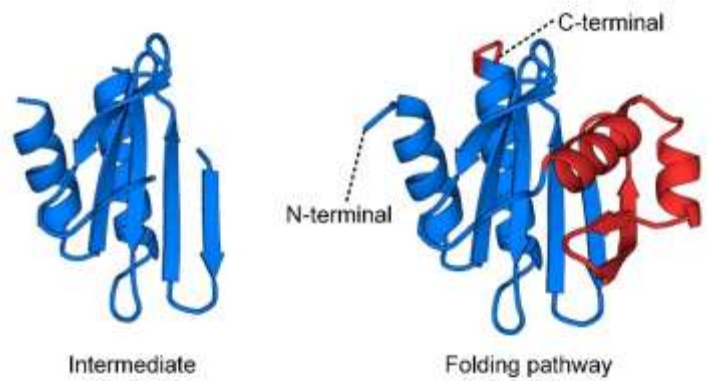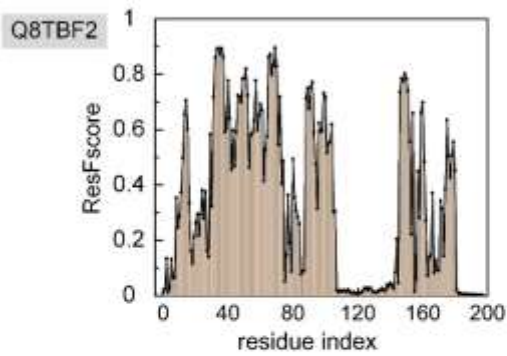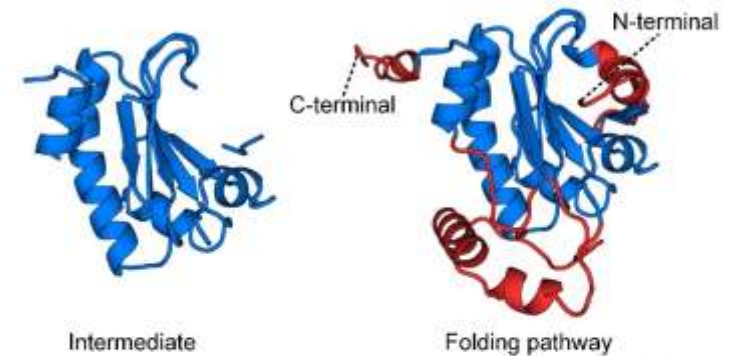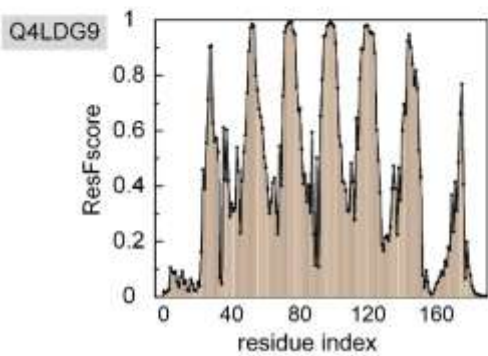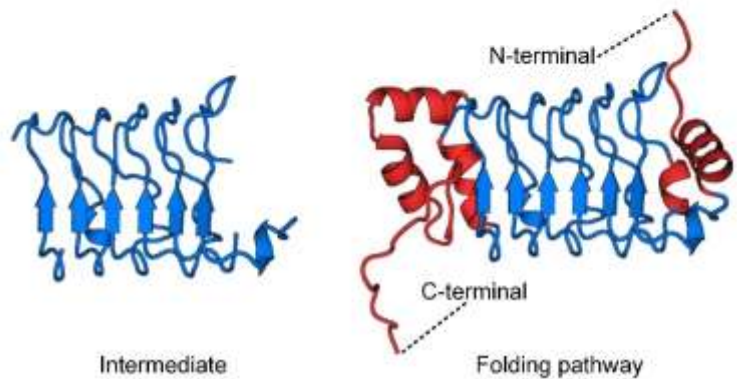

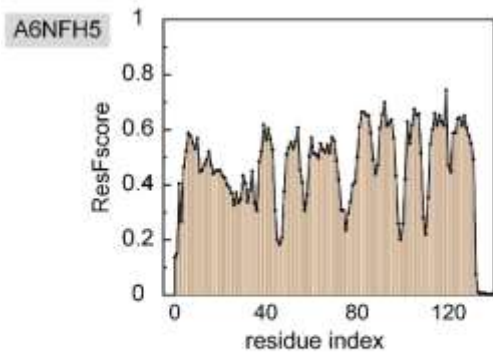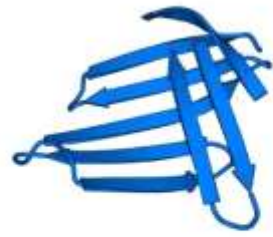

Intermediate

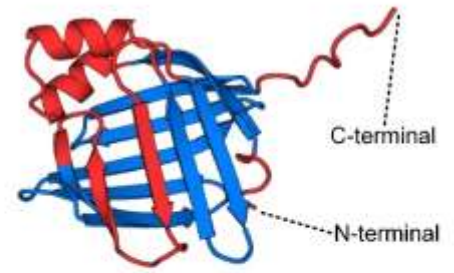

Folding pathway

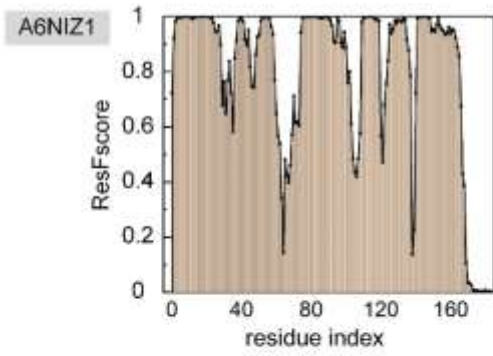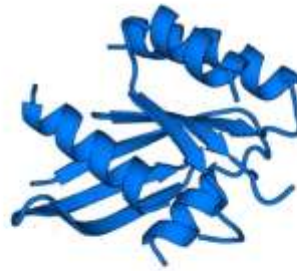

Intermediate

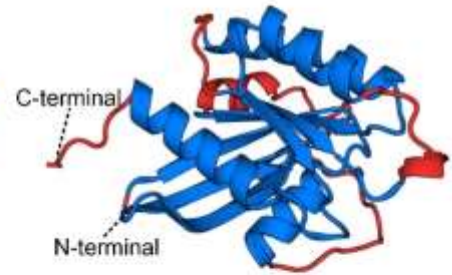

Folding pathway

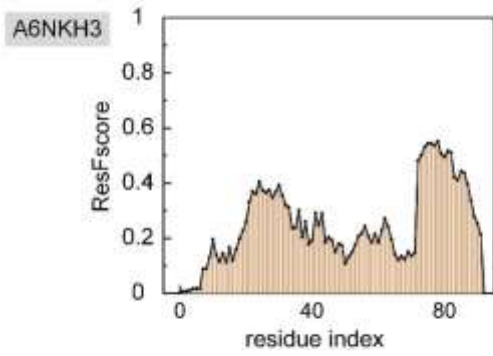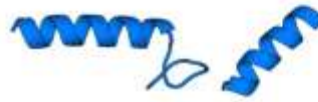

Intermediate

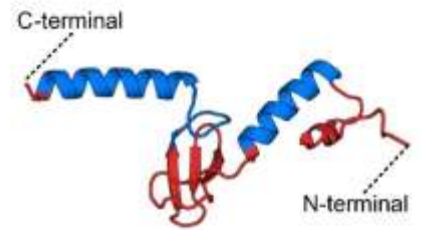

Folding pathway

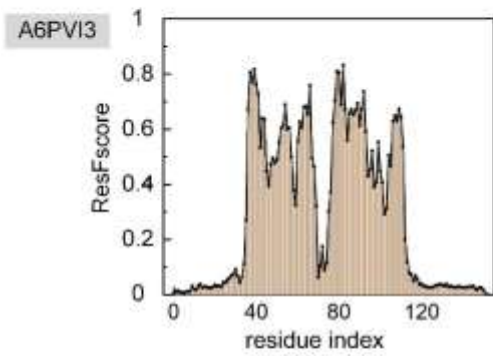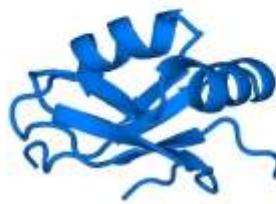

Intermediate

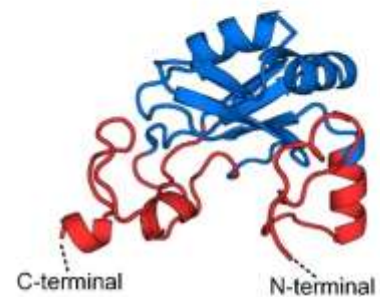

Folding pathway

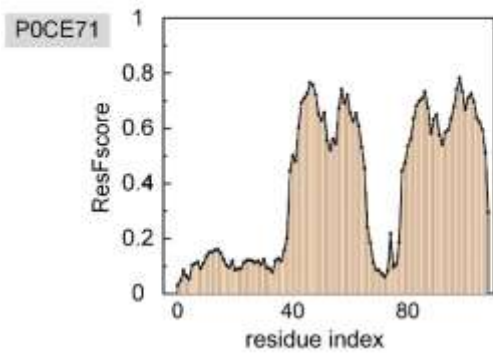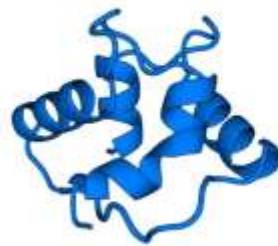

Intermediate

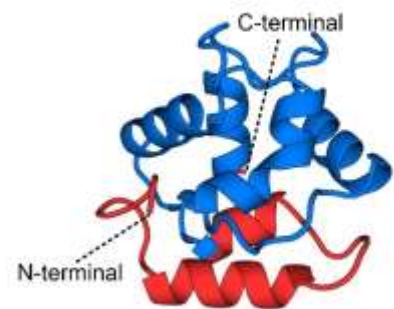

Folding pathway

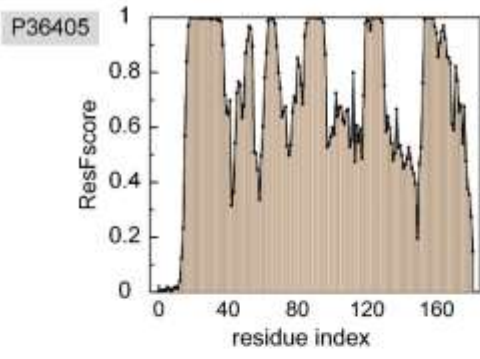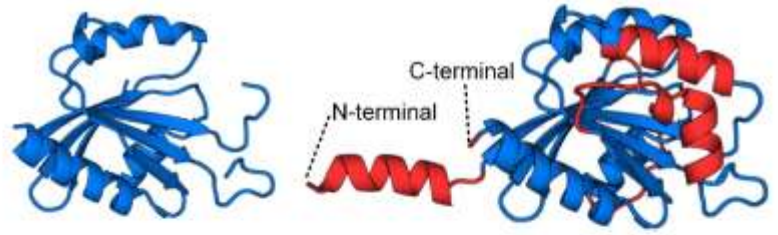

Intermediate

Folding pathway

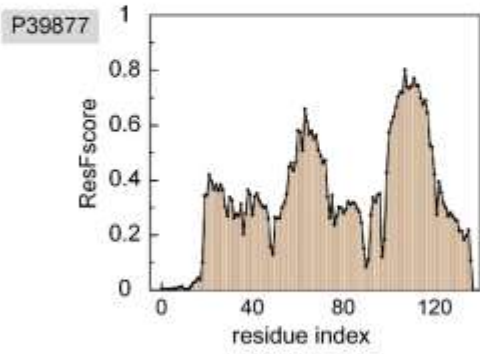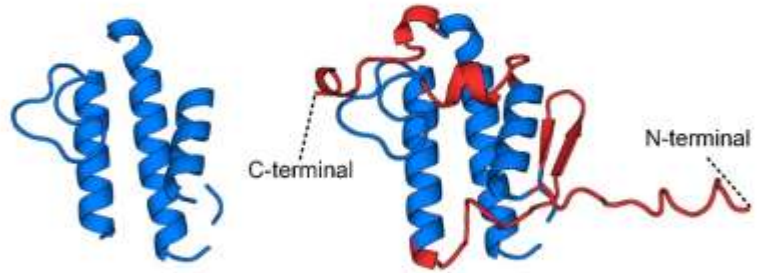

Intermediate

Folding pathway

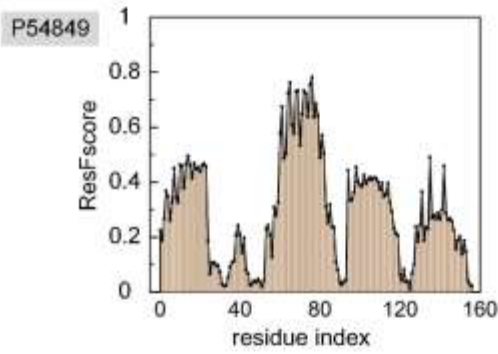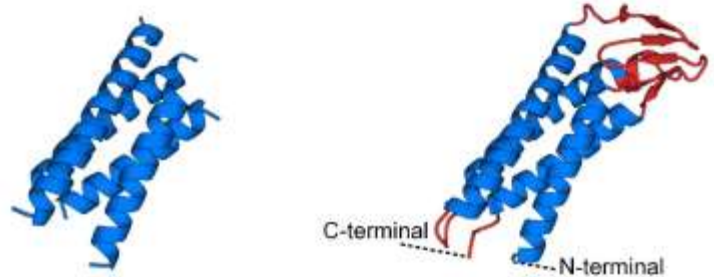

Intermediate

Folding pathway

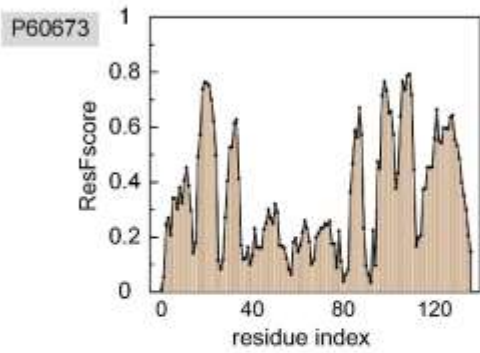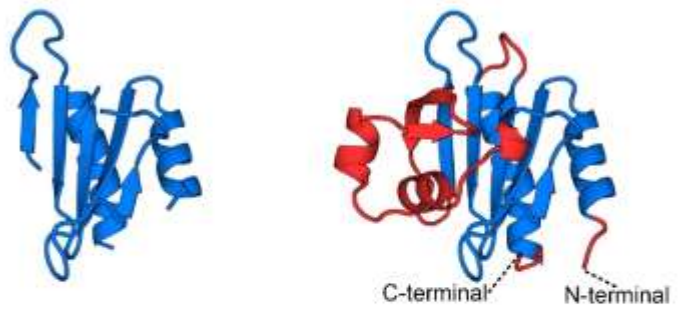

Intermediate

Folding pathway

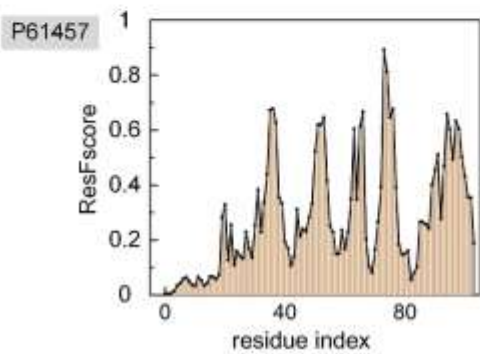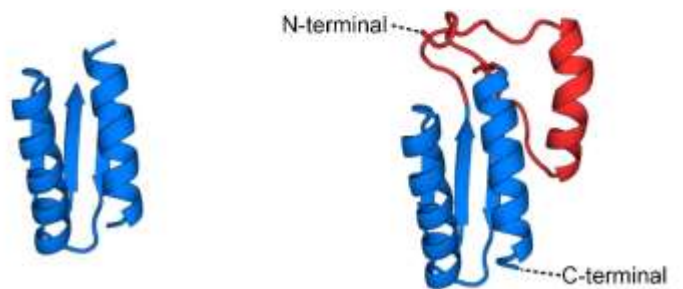

Intermediate

Folding pathway

**Figure S8.** The folding pathways of 30 human proteins were determined by PAtreader. The residue frequency distributions are shown on the left, the folding intermediate are shown in the middle, and the folding order are shown on the right. The folding order is blue and then red.

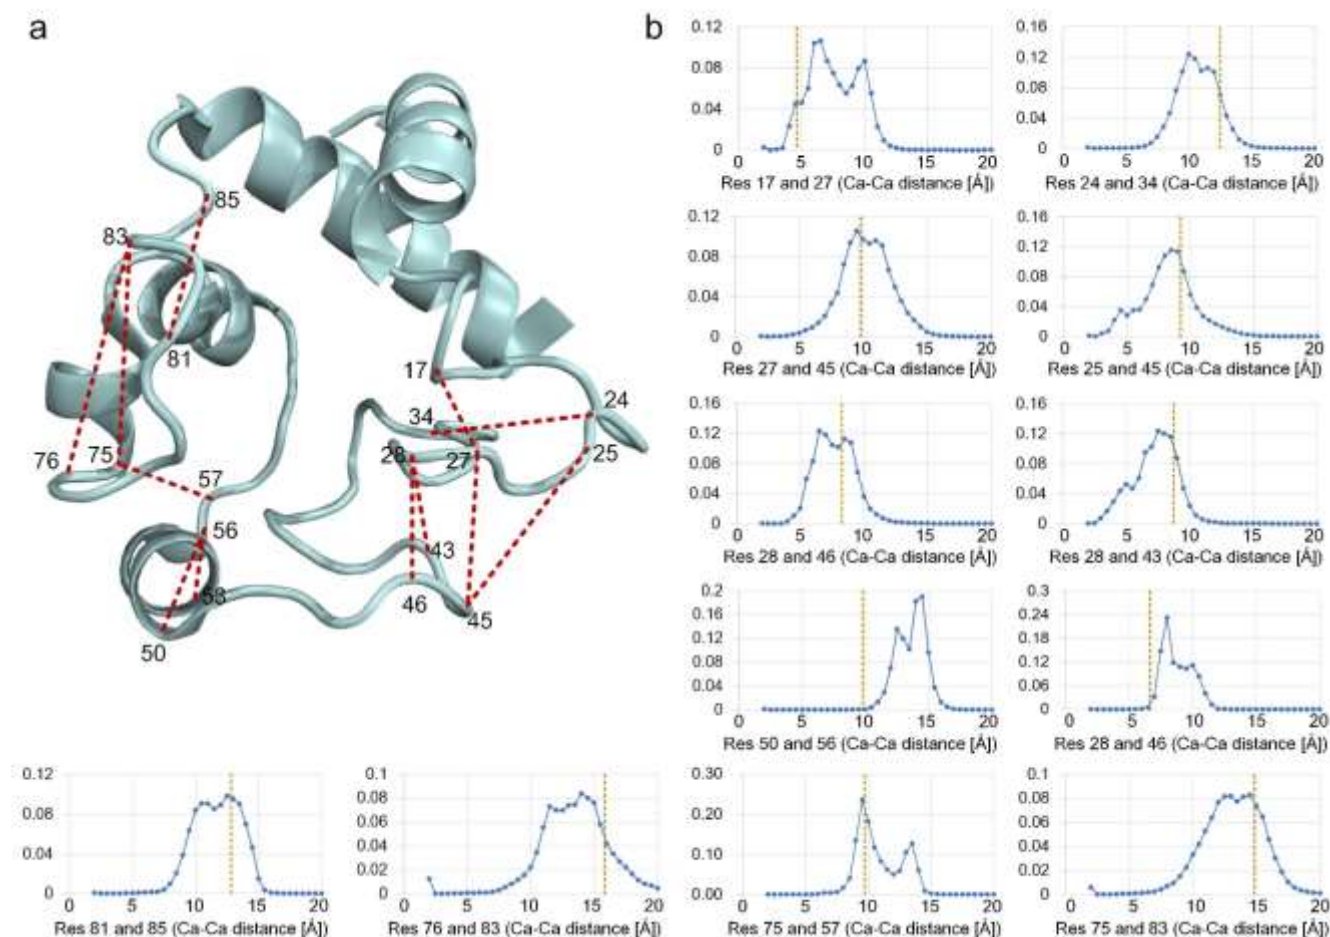

**Figure S9. a** 3D structure of oxidized horse heart cytochrome c. **b** Multi-peak distance distribution of flexible regions protein predicted by DeepMDisPre. The yellow dotted line is the true distance corresponding to the 3D structure. The figure presents 12 predicted cytochrome c residue pairs with multiple local maxima that were significantly visible, which distributed in the flexible region except three helices.



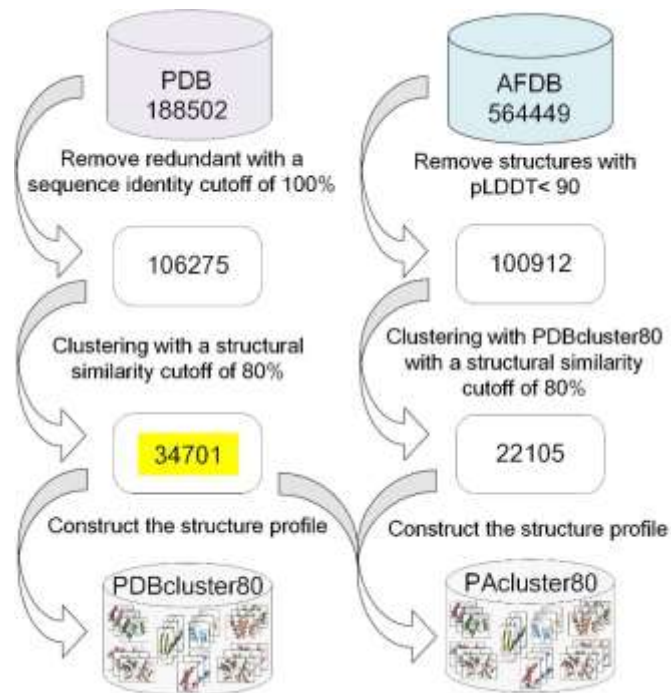

**Figure S10.** Schematic of the construction of the master structure database. PAcluster80 is constructed with 56,805 clusters consisting of 106,275 PDB structures and 100,912 AlphaFold DB structures. The structural profiles are extracted from the structural classes.

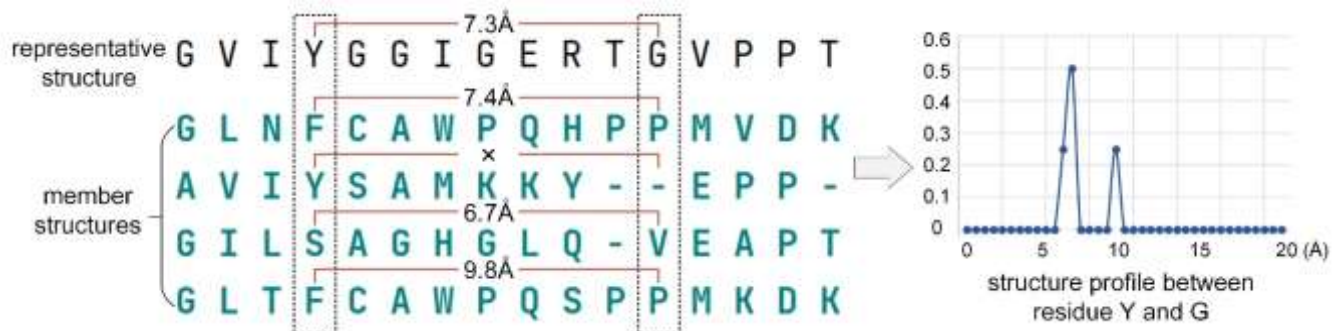

**Figure S11.** Schematic of the construction of structure profiles from structure classes in the master structure database PAcluster80. The member structures of the clusters are globally aligned with the center structure by TM-align. The distance range (2-20 Å) was then divided into 36 bins with a size of 0.5 Å, plus one bin for residue pair distances  $\geq 20$  Å. The number of times of falling into the bin divided by the total was taken as the probability. The residues pairs with gaps are not included in the total.

## Supplementary Tables

**Table S1.** Summary of the results of the ablation experiments. The results are obtained by computing the TM-score of the first template.

|                               | (0.9, 1.0]   | (0.7, 0.9]   | (0.5, 0.7]   | (0.0, 0.5]   | All          |
|-------------------------------|--------------|--------------|--------------|--------------|--------------|
| Contribution of AlphaFold DB  |              |              |              |              |              |
| PAthreader                    | <b>0.899</b> | <b>0.787</b> | <b>0.568</b> | <b>0.424</b> | <b>0.725</b> |
| PAthreader (w/o AlphaFold DB) | 0.898        | 0.775        | 0.521        | 0.324        | 0.702        |
| HHsearch                      | 0.840        | 0.718        | 0.476        | 0.272        | 0.646        |
| LOMETS3                       | 0.868        | 0.754        | 0.534        | 0.342        | 0.689        |
| Contribution of pDMScore      |              |              |              |              |              |
| PAthreader                    | <b>0.899</b> | <b>0.787</b> | <b>0.568</b> | <b>0.424</b> | <b>0.725</b> |
| PAthreader (alignScore)       | 0.896        | 0.781        | 0.562        | 0.408        | 0.718        |
| PAthreader (pDMScore)         | 0.878        | 0.774        | 0.557        | 0.422        | 0.712        |

**Table S2.** TM-score of template recognition on 551 tested proteins. Tested proteins were divided into four subsets (0-0.5, 0.5-0.7, 0.7-0.9 and 0.9-1) based on TM-score of the best template of targets in PDB. Bold text highlights the best result in each category.

|               | (0.9, 1.0]   | (0.7, 0.9]   | (0.5, 0.7]   | (0.0, 0.5]   | All          |
|---------------|--------------|--------------|--------------|--------------|--------------|
|               | num (58)     | num (321)    | num (149)    | num (23)     | num (551)    |
| PAthreader    | <b>0.899</b> | <b>0.787</b> | <b>0.568</b> | <b>0.424</b> | <b>0.725</b> |
| HHsearch      | 0.840        | 0.718        | 0.476        | 0.272        | 0.646        |
| LOMETS3       | 0.868        | 0.754        | 0.534        | 0.342        | 0.689        |
| SPARKS-X      | 0.851        | 0.736        | 0.505        | 0.326        | 0.669        |
| MUSTER        | 0.854        | 0.737        | 0.500        | 0.327        | 0.668        |
| CEthreader    | 0.859        | 0.740        | 0.507        | 0.322        | 0.672        |
| EigenTHREADER | 0.841        | 0.727        | 0.488        | 0.324        | 0.656        |

**Table S3.** Summary of the results of top 10 public servers on the three-month CAMEO blind test ([https://www.cameo3d.org/modeling/3-months/difficulty/all/?to\\_date=2022-07-09](https://www.cameo3d.org/modeling/3-months/difficulty/all/?to_date=2022-07-09)).

| Server name       | Targets |          | Average LDDT |          |
|-------------------|---------|----------|--------------|----------|
|                   | All     | #Modeled | All          | #Modeled |
| PAthreader        | 189     | 189      | 84.4         | 84.4     |
| SADA              | 189     | 189      | 83.9         | 83.9     |
| ZJUT-DeepAssembly | 189     | 183      | 81.4         | 84.0     |
| MultiDFold        | 189     | 189      | 81.2         | 81.2     |
| AIRFold           | 189     | 181      | 80.2         | 83.8     |
| MEGA-EvoGen       | 189     | 175      | 78.0         | 84.3     |
| ManiFold          | 189     | 172      | 74.9         | 82.3     |
| IntFOLD7          | 189     | 169      | 72.3         | 80.8     |
| RoseTTAFold       | 189     | 175      | 68.2         | 73.6     |
| pureAF2_notemp    | 189     | 142      | 63.2         | 84.2     |

3 months - [2022-04-15 - 2022-07-09] - "All targets" dataset

| Server Name                  | Common Subset - Start Comparison | Avg. response time (h:mm:ss) | Targets    |          |                  |                | Average IDDT |         |
|------------------------------|----------------------------------|------------------------------|------------|----------|------------------|----------------|--------------|---------|
|                              |                                  |                              | #Submitted | #Modeled | #Submitted Oligo | #Modeled Oligo | All          | Modeled |
| PAthreader                   |                                  | 56:47:48                     | 189        | 189      | 58               | 0              | 84.4         | 84.4    |
| SADA                         |                                  | 65:06:46                     | 189        | 189      | 58               | 0              | 83.9         | 83.9    |
| ZJUT-DeepAssembly            |                                  | 69:44:45                     | 189        | 183      | 58               | 0              | 81.4         | 84.0    |
| MultiDFold                   |                                  | 76:56:34                     | 189        | 189      | 58               | 0              | 81.2         | 81.2    |
| AIRFold                      |                                  | 20:22:30                     | 189        | 181      | 58               | 0              | 80.2         | 83.8    |
| MEGA-EvoGen                  |                                  | 64:33:26                     | 189        | 175      | 58               | 0              | 78.0         | 84.3    |
| ManiFold                     |                                  | 69:23:44                     | 189        | 172      | 58               | 0              | 74.9         | 82.3    |
| IntFOLD7                     |                                  | 31:36:32                     | 189        | 169      | 58               | 0              | 72.3         | 80.8    |
| RoseTTAFold                  |                                  | 19:17:58                     | 189        | 175      | 58               | 0              | 68.2         | 73.6    |
| BestSingleStructuralTemplate |                                  | 04:11:21                     | 189        | 171      | 58               | 0              | 64.4         | 71.2    |
| pureAF2_notemp               |                                  | 24:12:41                     | 189        | 142      | 58               | 0              | 63.2         | 84.2    |

**Table S4.** Summary of the results of 17 proteins of SARS-CoV-2 virus.

|                                       | Structure modelling |            | Template recognition |          |
|---------------------------------------|---------------------|------------|----------------------|----------|
|                                       | PAThreader          | AlphaFold2 | PAThreader           | HHsearch |
| Helicase                              | 0.968               | 0.969      | 0.945                | 0.945    |
| Proteinase 3CL-PRO                    | 0.981               | 0.964      | 0.993                | 0.985    |
| nucleocapsid protein                  | 0.962               | 0.917      | 0.961                | 0.749    |
| Non-structural protein 7              | 0.953               | 0.861      | 0.952                | 0.573    |
| Uridylate-specific endoribonuclease   | 0.989               | 0.967      | 0.975                | 0.081    |
| ORF7a                                 | 0.943               | 0.943      | 0.924                | 0.924    |
| Non-structural protein 9              | 0.877               | 0.873      | 0.841                | 0.789    |
| Papain-like proteinase                | 0.995               | 0.991      | 0.995                | 0.954    |
| Non-structural protein 10             | 0.171               | 0.176      | 0.191                | 0.170    |
| Papain-like proteinase                | 0.987               | 0.825      | 0.985                | 0.861    |
| ORF3a                                 | 0.812               | 0.800      | 0.355                | 0.186    |
| nucleocapsid protein                  | 0.974               | 0.955      | 0.836                | 0.836    |
| Non-structural protein 8              | 0.580               | 0.390      | 0.419                | 0.575    |
| ORF8                                  | 0.410               | 0.749      | 0.270                | 0.208    |
| Envelope Protein Transmembrane Domain | 0.607               | 0.602      | 0.599                | 0.610    |
| NSP1                                  | 0.947               | 0.947      | 0.356                | 0.896    |
| Papain-like proteinase                | 0.874               | 0.870      | 0.731                | 0.732    |
| Average TM-score                      | 0.825               | 0.812      | 0.725                | 0.651    |

**Table S5.** Summary of the results of protein folding pathway exploration. 30 human proteins whose native structures have not been determined by biological experiments were labeled with their UniProt accession. The first template is labelled by PDB ID or AlphaFold DB ID. The last column represents the proportion of templates used to identify intermediates in the different pfam families (only the top three families with the highest proportions are listed), where templates from the PDB were used for the statistics (most of the structures from the AlphaFold DB were not assigned to pfam family).

|                                                                                                   | Protein    | First template | Residue range of folding intermediate            | pfam family                                                        |
|---------------------------------------------------------------------------------------------------|------------|----------------|--------------------------------------------------|--------------------------------------------------------------------|
| 7 proteins (crystal structures and folding pathways determined by biological experiments)         |            |                |                                                  |                                                                    |
| 1                                                                                                 | 1I5T       | AF-P99999-F1   | 3-13, 61-67, 88-101                              | Cytochrom_C (49.7%)<br>S1-P1_nuclease (5.7%)<br>H_PPase (4.5%)     |
| 2                                                                                                 | 1BE9       | 5HF4_A         | 12-29, 36-92                                     | PDZ (69.2%)<br>FAD_binding_3 (4.6%)<br>Amino_oxidase (4.6%)        |
| 3                                                                                                 | 2LZM       | 3FI5_A         | 1-13, 65-164                                     | Phage_lysozyme (80.8%)<br>7tm_1 (11.1%)<br>Pesticin (2.0%)         |
| 4                                                                                                 | 1DKT       | AF-B0G102-F1   | 3-25, 51-68                                      | Pkinase (63.5%)<br>PK_Tyr_Ser-Thr (18.6%)<br>Ribosomal_S24e (4.6%) |
| 5                                                                                                 | 1MBC       | 5YCI_A         | 4-43, 59-76, 101-118, 125-148                    | Globin (100%)                                                      |
| 6                                                                                                 | 1NTI       | AF-Q9D258-F1   | 1-14, 21-41, 62-86                               | COX1 (15.9%)<br>ACBP (11.1%)<br>H_PPase (8.7%)                     |
| 7                                                                                                 | 1YYJ       | 6G7O_A         | 3-42, 56-79                                      | Cytochrom_B562 (21.4%)<br>7tm_1 (16.6%)<br>Vinculin (5.9%)         |
| 30 human proteins (crystal structures and folding paths not determined by biological experiments) |            |                |                                                  |                                                                    |
| 1                                                                                                 | A0A1W2PQ64 | AF-U7PWC0-F1   | 8-12, 18-37, 107-110, 134-139                    | adh_short_C2 (19.6%)<br>Pantoate_ligase(13.5%)<br>DLH (9.5%)       |
| 2                                                                                                 | A0A5A2     | AF-A0A5A2-F1   | 23-69, 83-113                                    | V-set (50.7%)<br>C1-set (38.8%)<br>DUF1968 (10.4%)                 |
| 3                                                                                                 | A1L167     | AF-A1L167-F1   | 1-9, 23-46, 52-116                               | UQ_con (77.1%)<br>TPR_8 (6.8%)<br>SHMT (5.1%)                      |
| 4                                                                                                 | A6NCE7     | AF-Q9GZQ8-F1   | 13-37, 51-70, 79-83, 88-102,<br>109-115          | ATG8 (31.1%)<br>PI3_PI4_kinase (17.4%)<br>Sell (5.4%)              |
| 5                                                                                                 | A6NFH5     | AF-A6NFH5-F1   | 7-15, 40-55, 80-131                              | Lipocalin (48.8%)<br>FGF (23.2%)<br>Lipoprotein_1 (8.4%)           |
| 6                                                                                                 | A6NIZ1     | AF-Q6TEN1-F1   | 2-25, 37-58, 75-104,<br>111-120, 128-151,154-168 | Ras (100%)                                                         |

|    |        |              |                                    |                                                                       |
|----|--------|--------------|------------------------------------|-----------------------------------------------------------------------|
| 7  | A6NKH3 | AF-P54051-F1 | 20-34, 66-91                       | RNA_pol_Rpb2_6 (38.5%)<br>TPR_8 (8.3%)<br>Sel1 (4.5%)                 |
| 8  | A6PVI3 | AF-Q93594-F1 | 16-69, 76-120                      | RRM_1 (63.9%)<br>GTP_EFTU_D2 (4.1%)<br>Acyl_transf_1 (4.1%)           |
| 9  | P01037 | AF-P21460-F1 | 62-94, 106-124, 129-139            | Cystatin (17.8%)<br>SnoaL_4 (5.9%)<br>Ring_hydroxyl_B (5.9%)          |
| 10 | P09105 | 1ABW_A       | 5-36, 54-72, 93-137                | Globin (95.7%)<br>Phycobilisome (3.8%)<br>Protoglobin (0.2%)          |
| 11 | P0CE71 | AF-Q9I8V0-F1 | 34-108                             | EF-hand_7 (59.0%)<br>EF-hand_5 (8.6%)<br>EF-hand_1 (4.5%)             |
| 12 | P0CF74 | AF-P01843-F1 | 7-14, 23-43, 65-73, 84-99          | C1-set (50.9%)<br>V-set (49.1%)                                       |
| 13 | P0CL84 | AF-P0CL84-F1 | 19-35, 43-117                      | Arm (25.2%)<br>Arm_3 (17.5%)<br>HEAT_EZ (12.6%)                       |
| 14 | P0DI81 | AF-Q9CQP2-F1 | 5-22, 60-110, 124-137              | Peptidase_M4 (15.8%)<br>RVT_1 (10.3%)<br>Clat_adaptor_s (9.7%)        |
| 15 | P36405 | AF-Q9M9N1-F1 | 16-38, 51-99, 112-135, 153-181     | Ras (66.0%)<br>Arf (28.2%)<br>MMR_HSR1 (2.9%)                         |
| 16 | P39877 | AF-Q9WVF6-F1 | 20-32, 44-75, 97-125               | Phospholip_A2_1 (59.9%)<br>COX1 (7.2%)<br>ABC_tran (6.3%)             |
| 17 | P54849 | AF-P54849-F1 | 2-24, 59-88, 95-120, 132-153       | Acyl-CoA_dh_N (28.0%)<br>Vinculin (10.0%)<br>PMP22_Claudin (10.0%)    |
| 18 | P60673 | AF-P60673-F1 | 4-39, 85-112, 118-134              | Profilin (14.9%)<br>GAF (10.4%)<br>Robl_LC7 (9.4%)                    |
| 19 | P61457 | AF-P61459-F1 | 34-77, 87-103                      | Pyridoxal_deC (17.4%)<br>Aminotran_5 (13.0%)<br>Aminotran_1_2 (13.0%) |
| 20 | Q2M238 | AF-Q2M238-F1 | 3-16, 22-38, 44-65, 75-99          | CRM1_repeat (17.4%)<br>Arm (10.5%)<br>HEAT_EZ (8.7%)                  |
| 21 | Q4LDG9 | AF-Q4LDG9-F1 | 19-41, 47-129, 139-150,<br>175-176 | LRR_8 (68.6%)<br>LRR_adjacent (8.8%)<br>LRR_5 (3.8%)                  |
| 22 | Q5JXB2 | AF-Q5JXB2-F1 | 34-87, 93-114, 134-148             | UQ_con (99.3%)<br>zf-C3HC4_2 (0.7%)                                   |

|    |        |              |                                          |                                                            |
|----|--------|--------------|------------------------------------------|------------------------------------------------------------|
| 23 | Q5U5X0 | AF-Q688I0-F1 | 2-42, 50-68                              | Ammonium_transp (26.9%)<br>Fe-ADH (10.6%)<br>ANAPC1 (6.7%) |
| 24 | Q6B0K9 | 1A3O_A       | 4-35, 92-112, 119-137                    | Globin (90.6%)<br>Phycobilisome (9.4%)                     |
| 25 | Q6IPR1 | AF-Q6IPR1-F1 | 3-24,49-83                               | 2014/3/3 (22.5%)<br>HEAT_EZ (9.8%)<br>TPR_8 (5.9%)         |
| 26 | Q6ZSU1 | AF-Q9DBX6-F1 | 2-15, 24-29, 38-69, 76-115               | p450 (100%)                                                |
| 27 | Q8N0U8 | AF-Q8N0U8-F1 | 107-171                                  | ABC_tran (17.8%)<br>FCH (13.8%)<br>COX1 (10.5%)            |
| 28 | Q8N4G2 | AF-Q8N4G2-F1 | 12-35, 47-68, 79-96, 114-132,<br>151-191 | Ras (69.2%)<br>Arf (30.8%)                                 |
| 29 | Q8NHR9 | AF-Q5IRJ7-F1 | 3-41, 80-126                             | Profilin (17.0%)<br>GAF (12.5%)<br>Robl_LC7 (10.8%)        |
| 30 | Q8TBF2 | AF-Q8TBF2-F1 | 13-16, 28-106, 147-163,<br>173-183       | 1-cysPrx_C (40.2%)<br>AhpC-TSA (19.1%)<br>Redoxin (16.6%)  |



**Table S6.** The parameter descriptions in PAtreader.

|                                                                                   |            |                                       |
|-----------------------------------------------------------------------------------|------------|---------------------------------------|
| Number of structure classes used in the second three-track alignment stage        | $N_{clu}$  | 500                                   |
| Number of templates to predict pDMScore                                           | $N_{pDM}$  | 50                                    |
| Number of templates used to identify intermediate                                 | $N_t$      | 500                                   |
| Threshold of ResFscore used to identify intermediate                              | $I_{cut}$  | 0.4                                   |
| Weight of pDMScore in loss function                                               | $w$        | 10                                    |
| Infinitely small quantity in pDMScore                                             | $\epsilon$ | 0.001                                 |
| Number of maxima of the distance profile                                          | $k_a$      | 3                                     |
| Number of maxima of the structure profile in the two three-track alignment stages | $k_b$      | first stage: 3<br>second stage: 1     |
| Threshold of inter-residue distance                                               | $\lambda$  | first stage: 10Å<br>second stage: 20Å |

**Table S7.** Physical and geometric features extracted from templates.

|                    |                             |                                                                                                                |                                                                                                                                                                                                      |
|--------------------|-----------------------------|----------------------------------------------------------------------------------------------------------------|------------------------------------------------------------------------------------------------------------------------------------------------------------------------------------------------------|
| Physical features  | Amino acid properties       | L×20                                                                                                           | One-hot encoded amino acids.                                                                                                                                                                         |
|                    |                             | L×24                                                                                                           | Blosum62 scores.                                                                                                                                                                                     |
|                    |                             | L×7                                                                                                            | Per amino-acid feature sets from Meiler.                                                                                                                                                             |
|                    | Secondary structures        | L×4                                                                                                            | Three state secondary structures given by DSSP solver.                                                                                                                                               |
|                    | Rosetta energy              | L×4                                                                                                            | One-body terms: p_aa_pp, rama_prepro, omega, fa_dun.                                                                                                                                                 |
| L×L×9              |                             | Two-body terms: fa_atr, fa_rep, fa_sol, lk_ball_wtd, fa_elec, hbond_bb_sc, hbond_sc, hbond_sr_bb, hbond_lr_bb. |                                                                                                                                                                                                      |
| Geometric features | Multi-distances             | L×L×5                                                                                                          | Inter-residue $C_\beta$ to $C_\beta$ distance map.<br>$C_\alpha$ to tip-atom distance map.<br>Tip-atom to $C_\alpha$ distance map.<br>Tip-atom to tip-atom distance map.<br>Sequence separation map. |
|                    | Orientations                | L×L×6                                                                                                          | cosine and sine of dihedral and planar angles defined by trRosetta.                                                                                                                                  |
|                    | Backbone angles and lengths | L×6                                                                                                            | Phi, Psi, and Omega angles.<br>Standardized length between backbone atoms.                                                                                                                           |
|                    | Voxelization                | L×24×24<br>×24×167                                                                                             | Voxelized each residue individually in the corresponding local coordinate frame defined by the backbone C, $C_\alpha$ , and N atoms.                                                                 |
|                    | Ultrafast Shape Recognition | L×3                                                                                                            | The first moment calculation of the distance sets at the three reference positions.                                                                                                                  |

## Supplementary References

1. Fu, L., Niu, B., Zhu, Z., Wu, S. & Li, W. CD-HIT: accelerated for clustering the next-generation sequencing data. *Bioinformatics* **28**, 3150-3152 (2012).
2. Steinegger, M. et al. HH-suite3 for fast remote homology detection and deep protein annotation. *BMC Bioinformatics* **20** (2019).
3. Zheng, W. et al. LOMETS3: integrating deep learning and profile alignment for advanced protein template recognition and function annotation. *Nucleic Acids Res* **50**, W454-W464 (2022).
4. Bai, Y., Sosnick, T.R., Mayne, L. & Englander, S.W. Protein folding intermediates: Native-state hydrogen exchange. *Science* **269**, 192-197 (1995).
5. Englander, S.W. & Mayne, L. The case for defined protein folding pathways. *Proc. Natl Acad. Sci. USA* **114**, 8253-8258 (2017).
