# Supplementary material
Source: PubMed Central journal article supplement (PMC9985648)
Supplement: 42003_2023_4605_MOESM3_ESM.pdf [file 42003_2023_4605_MOESM3_ESM.pdf]

## Description of Additional Supplementary Files

**File name:** Supplementary Data 1

**Description:** The source data behind the Figures 2-3 in the paper

**File name:** Supplementary Data 2

**Description:** The source data behind the Figures 4 in the paper

**File name:** Supplementary Data 3

**Description:** The source data behind the Figures 5-6 in the paper
